# Supplementary material for: MSL1 Promotes Liver Regeneration by Driving Phase Separation of STAT3 and Histone H4 and Enhancing Their Acetylation
Source: PubMed Central journal article supplement (PMC10427353; doi:10.1002/advs.202301094), 2023-06-06
Supplement: ADVS-10-2301094-s001.pdf [file ADVS-10-2301094-s001.pdf]

## Supporting Information

for *Adv. Sci.*, DOI 10.1002/adv.202301094

MSL1 Promotes Liver Regeneration by Driving Phase Separation of STAT3 and Histone H4 and Enhancing Their Acetylation

*Yucheng He, Shichao Wang, Shenghui Liu, Dan Qin, Zhangmei Liu, Liqiang Wang, Xiangmei Chen and Lisheng Zhang\**

## Supporting Information

### **MSL1 promotes liver regeneration by driving phase separation of STAT3 and Histone H4 and enhancing their acetylation**

*Yucheng He, Shichao Wang, Shenghui Liu, Dan Qin, Zhangmei Liu, Liqiang Wang, Xiangmei Chen and Lisheng Zhang\**

## Supplementary Figures and Figure legends

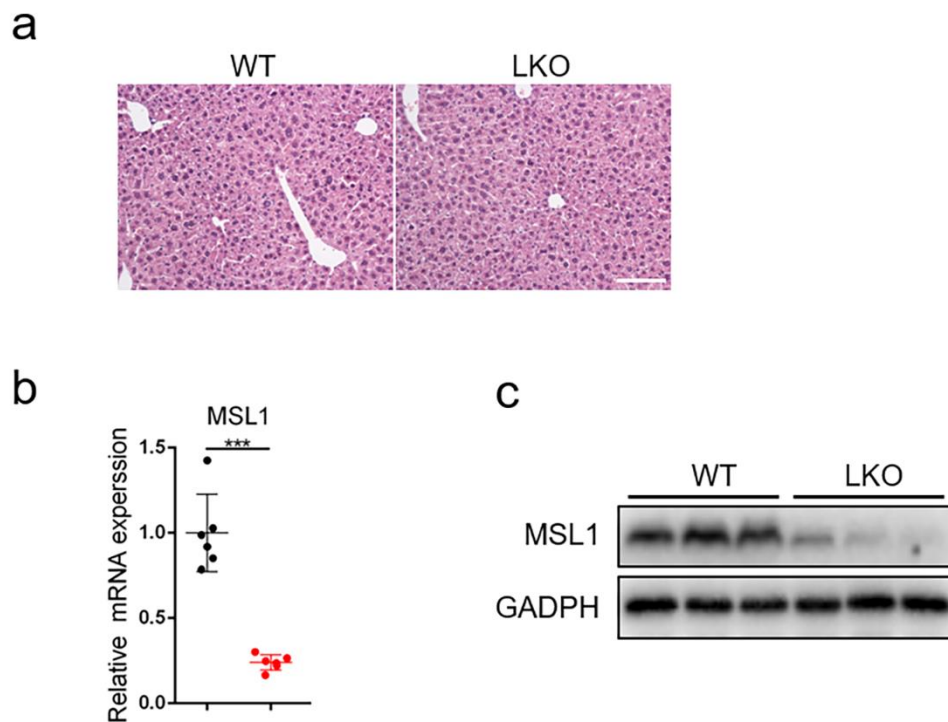

**Figure S1.** Related to Figure 1. a) H&E staining of liver tissue sections of WT and LKO mice. Scale bar, 50  $\mu$ m. b) qRT-PCR analysis of MSL1 mRNA expression in WT and LKO mouse livers (n = 6 mice/group). c) Immunoblot analysis of liver tissue lysates from WT and LKO mice using the indicated antibodies (n = 3 mice/group). The data were expressed as means  $\pm$  SD. Significant difference was presented at the level of \*\*\*p < 0.001 by two-tailed Student's t-test.

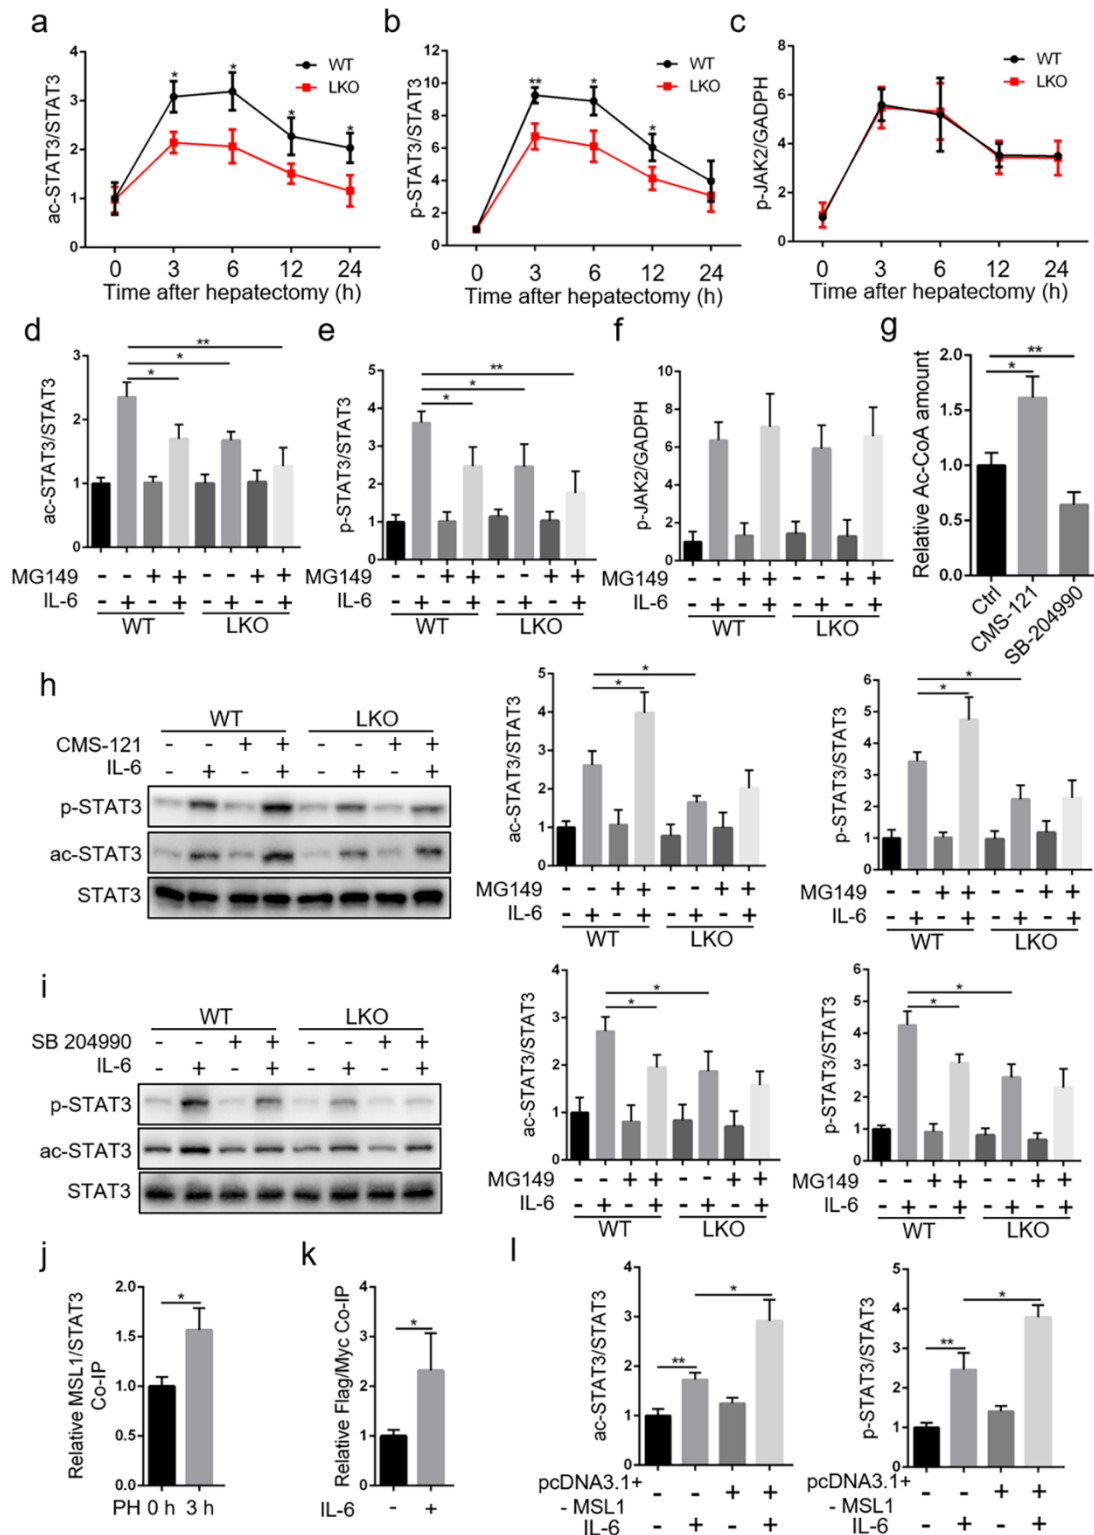

**Figure S2.** Related to Figure 2. a-c) Quantification of protein levels of ac-STAT3 (a), p-STAT3 (b) and p-JAK2 (c) as in (Figure 2a) by densitometric analysis and normalization versus loading control (n = 3). d-f) Quantification of protein levels of ac-STAT3 (d), p-STAT3 (e) and p-JAK2 (f) as in (Figure 2b) by densitometric analysis and

normalization versus loading control (n = 3). g) Primary mouse hepatocytes treatment with 1  $\mu$ M CMS-121 or 10  $\mu$ M SB 204990 for 24 h and quantification of the Ac-CoA concentration (n = 3). h,i) Immunoblot analyses were performed on primary mouse hepatocytes prepared from WT and LKO mice, and treatment with 1  $\mu$ M CMS-121 (h)/10  $\mu$ M SB-204990 (i) for 24 h and/or 10 ng mL<sup>-1</sup> IL-6 for 30 mins using the indicated antibodies. Right panels show the quantification of protein levels of ac-STAT3 and p-STAT3 by densitometric analysis and normalization versus loading control (n = 3). j) Quantification of protein levels of MSL1 as in (Figure 2f) by densitometric analysis and normalization versus immunoprecipitated STAT3 (n = 3). k) Quantification of protein levels of Flag-H4 as in (Figure 2g) by densitometric analysis and normalization versus immunoprecipitated Myc-MSL1 (n = 3). l) Quantification of protein levels of ac-STAT3 and p-STAT3 as in (Figure 2h) by densitometric analysis and normalization versus loading control (n = 3). The data were expressed as means  $\pm$  SD. Significant difference is presented at the levels of \*p < 0.05 and \*\*p < 0.05 by two-tailed Student's t-test.

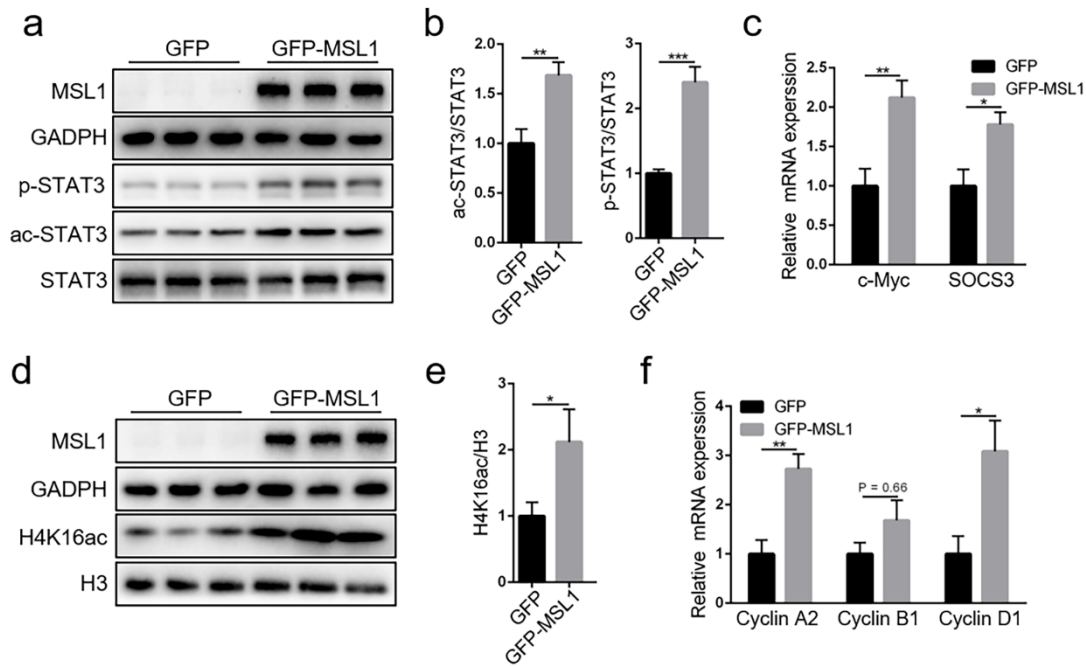

**Figure S3.** Overexpression of MSL1 in the hepatocytes promoted STAT3 and H4K16 acetylation. a) Immunoblotting analysis of GFP-positive primary mouse hepatocytes sorted by FACS at 3 h post-PH in mice using the indicated antibodies. b) Quantification of protein levels of ac-STAT3 and p-STAT3 as in (Figure S3a) by densitometric analysis and normalization versus loading control (n = 3). c) qRT-PCR analysis of c-Myc and SOCS3 mRNA expression in GFP-positive primary mouse hepatocytes sorted by FACS at 3 h post-PH in mice (n = 3). d) Immunoblotting analysis of GFP-positive primary mouse hepatocytes sorted by FACS at 36 h post-PH in mice using the indicated antibodies. e) Quantification of protein levels of H4K16ac as in (Figure S3d) by densitometric analysis and normalization versus loading control (n = 3). f) qRT-PCR analysis of Cyclin A2, Cyclin B1 and Cyclin D1 mRNA expression in GFP-positive primary mouse hepatocytes sorted by FACS at 36 h post-PH in mice (n = 3). The data were expressed as means  $\pm$  SD. Significant difference was presented at the level of \*p < 0.05, \*\*p < 0.01, and \*\*\*p < 0.001 by two-tailed Student's t-test.

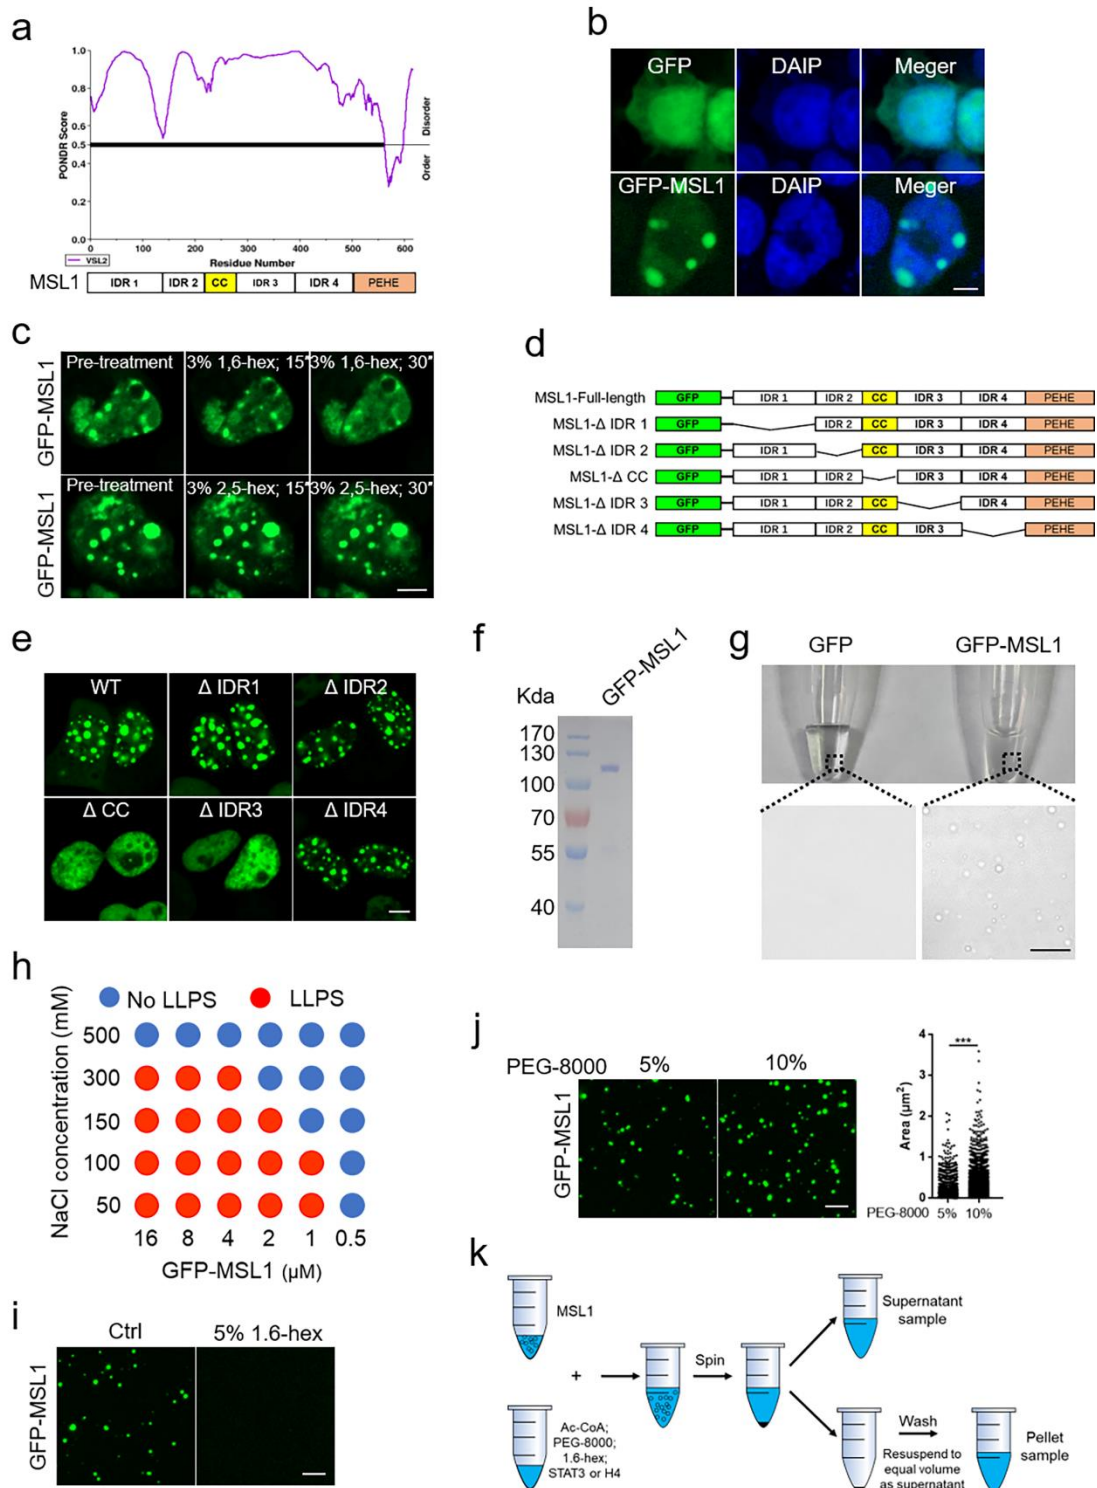

**Figure S4.** related to Figure 4. a) Graphs of IDR of MSL1 plotted by POND R VSL2. b) Confocal images of fixed HEK293T cells transfected with GFP-MSL1 or GFP for 24 h. Scale bar, 5  $\mu\text{m}$ . c) Confocal images of GFP-MSL1-transfected HEK293T cells before and after 1,6-hex or 2,5-hex treatment at indicated time points. Scale bar, 5  $\mu\text{m}$ . d) Diagram of full-length and truncated GFP-MSL1 proteins. e) Confocal images of

HEK 293T cells transfected with full-length or truncated GFP-MSL1 plasmids. Scale bar, 5  $\mu\text{m}$ . f) SDS-PAGE assay and Coomassie blue staining of GFP-MSL1 protein purified from *E. coil*. g) Images of GFP-MSL1 and GFP taken at room temperature. Scale bar, 10  $\mu\text{m}$ . h) Diagrams of GFP-MSL1 phase separation at various concentrations of salt (NaCl) and proteins. i) Images of GFP-MSL1 (8  $\mu\text{M}$ ) condensates at room temperature with or without 5% 1,6-hex treatment. Scale bar, 5  $\mu\text{m}$ . j) Images of GFP-MSL1 (8  $\mu\text{M}$ ) condensates at room temperature with 5% or 10% PEG-8000 treatments.  $n = 3$  fields ( $100 \times 100 \mu\text{m}^2$ ). Scale bar, 5  $\mu\text{m}$ . k) Schematic diagram of sedimentation assay to separate the condensed liquid phase and the aqueous phase with additional MSL1, Ac-CoA, PEG-8000, 1.6-hex, STAT3 or H4. The data were expressed as means  $\pm$  SD. Significant difference was presented at the level of \*\*\* $p < 0.001$  by two-tailed Student's t-test.



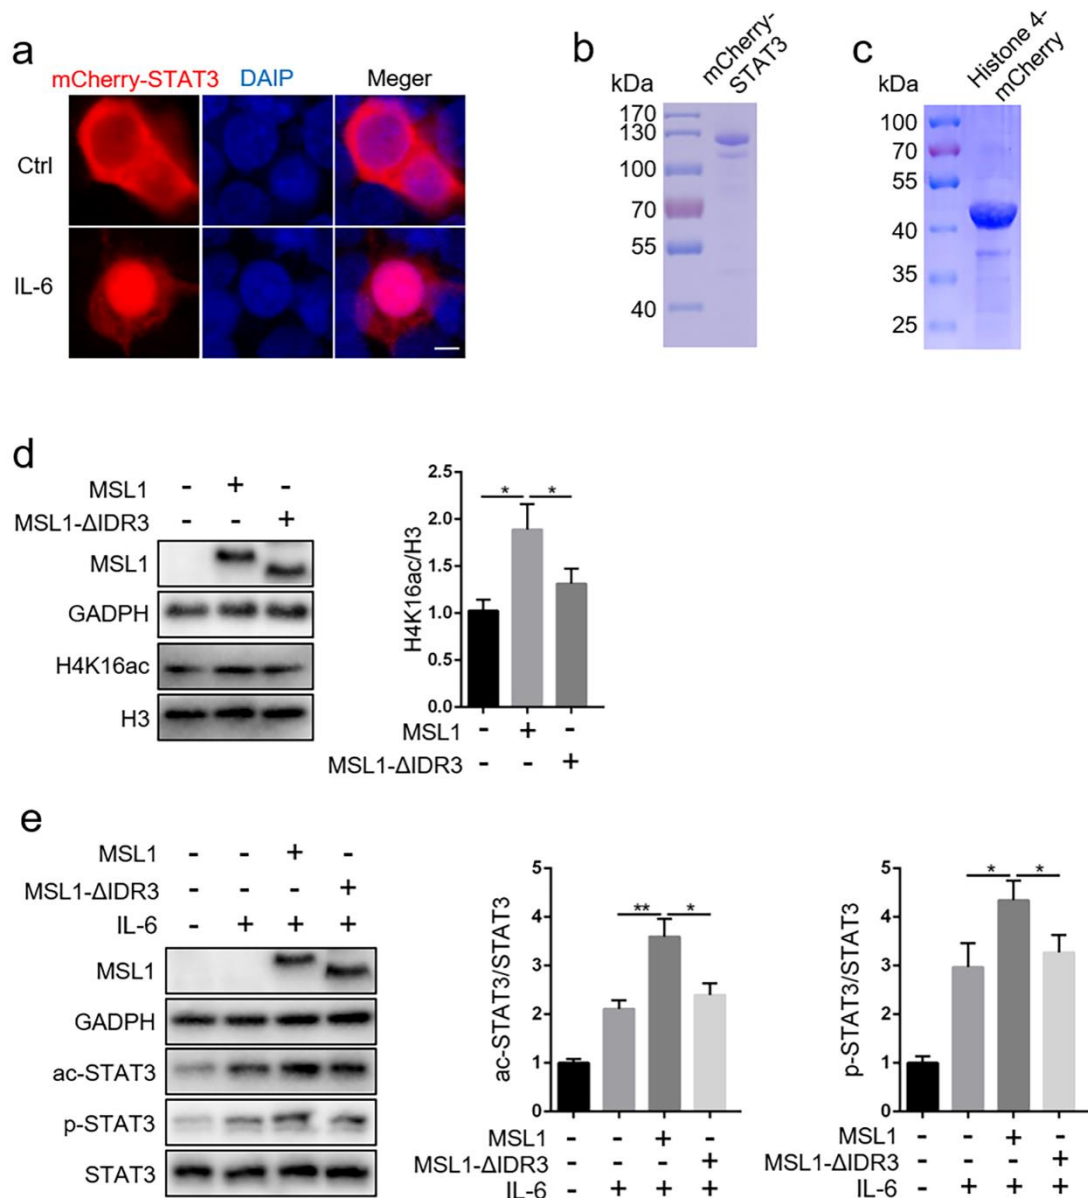

**Figure S5.** Related to Figure 5. a) Confocal images of fixed HEK293T cells transfected with mCherry-STAT3-encoding plasmids for 24 h without or with 10 ng mL<sup>-1</sup> IL-6 for 30 min. Scale bar, 5 μm. b,c) SDS-PAGE assay and Coomassie blue staining of mCherry-STAT3 (b) and Histone 4-mCherry (c) purified from *E. coli*. d) Immunoblot analysis of Hep1-6 cells transfected with MSL1 or MSL1-ΔIDR3 plasmids for 24 h using the indicated antibodies. Right panel show the quantification of protein levels of H4K16ac by densitometric analysis and normalization versus loading control (n = 3). e) Immunoblot analysis of Hep1-6 cells transfected with MSL1 or MSL1-ΔIDR3 plasmids for 24 h with or without 30-min IL-6 treatment (10 ng mL<sup>-1</sup>) using the indicated antibodies. Right panels show the quantification of protein levels of ac-

STAT3 and p-STAT3 by densitometric analysis and normalization versus loading control (n = 3). The data were expressed as means  $\pm$  SD Significant difference is presented at the levels of \*p < 0.05 and \*\*p < 0.01 by two-tailed Student's t-test.

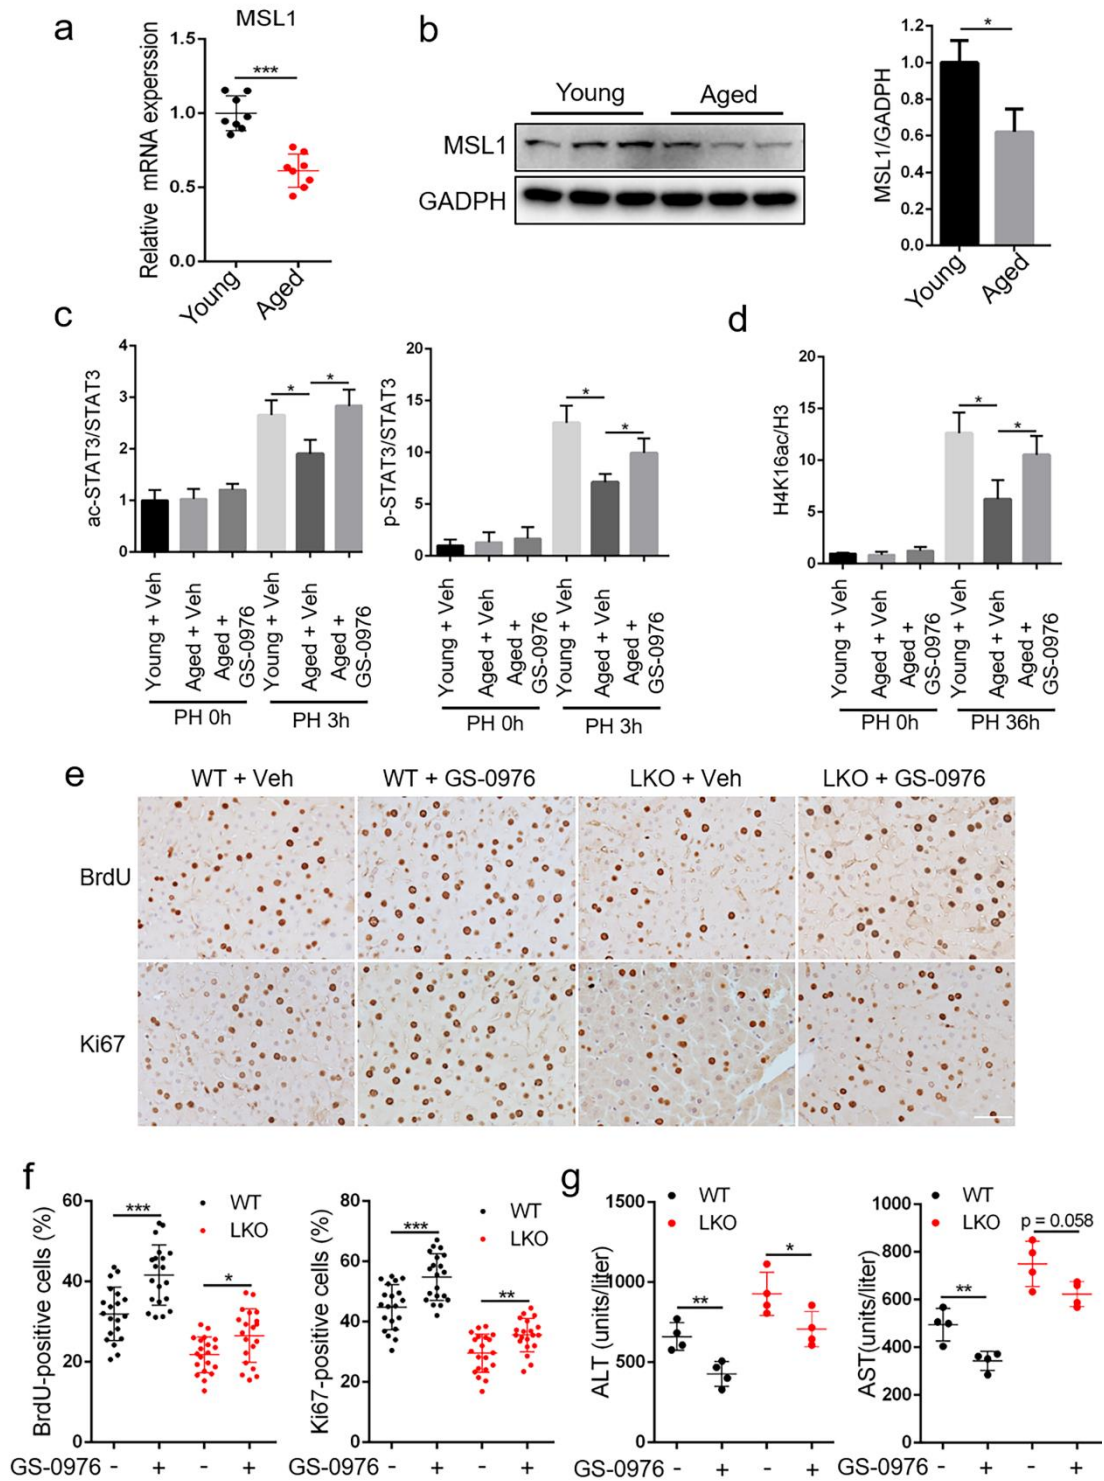

**Figure S6.** Related to Figure 6. a) qRT-PCR analysis of MSL1 in aged and young mouse livers (n = 8 mice/group). b) Immunoblot analysis of liver tissues lysates from young and aged mice using the indicated antibodies. c) Quantification of protein levels of ac-STAT3 and p-STAT3 as in (Figure 6f) by densitometric analysis and normalization versus loading control (n = 3). d) Quantification of protein levels of H4K16ac as in

(Figure 6g) by densitometric analysis and normalization versus loading control (n = 3).  
e) BrdU and Ki67 staining of liver tissues from WT and LKO mice treatment with or without GS-0976 at 36 h after PH. Scale bar, 50  $\mu\text{m}$ . f) BrdU- and Ki67-positive cell count at 36 h after PH, n = 4 mice/group, 5 fields ( $215 \times 285 \mu\text{m}^2$ ) quantified/animal.  
g) Serum ALT and AST levels in WT and LKO mice treatment with or without GS-0976 at 36 h after PH (n = 4 mice/group). The data were expressed as means  $\pm$  SD. Significant difference was presented at the level of \*\*\*p < 0.001 by two-tailed Student's t-test.

## Supplementary Tables

**Table S1. Primers used in qRT-PCR**

| Name      | Location       | Sequence (5' to 3')       | nt (bp) |
|-----------|----------------|---------------------------|---------|
| MSL1      | NM_028722.3    | F: TTTCTCATGTGGCCGGAGTG   | 204     |
|           |                | R: GGGGTTTCTTGGCTCCTCAA   |         |
| SOCS3     | NM_007707.3    | F: CCCCAAGAGAGCTTACTACA   | 139     |
|           |                | R: TTTCTCATAGGAGTCCAGGT   |         |
| c-Myc     | NM_010849.4    | F: TCCACTCACCAGCACAACTACG | 105     |
|           |                | R: GCTGATCTGCTTCAGGACCCT  |         |
| Cyclin A2 | NM_009828.3    | F: TGAAGAGGCAGCCAGACATCAC | 107     |
|           |                | R: AGCCAAATGCAGGGTCTCAT   |         |
| Cyclin B1 | NM_172301.3    | F: AAGGTGCCTGTGTGTGAACC   | 164     |
|           |                | R: AGATACTCTTCTGCAGGCGC   |         |
| Cyclin D1 | NM_001379248.1 | F: GCGTACCCTGACACCAATCTC  | 183     |
|           |                | R: CTCCTCTTCGCACTTCTGCTC  |         |
| 36B4      | NM_007475.5    | F: TGGAGACAAGGTGGGAGCC    | 271     |
|           |                | R: CACAGACAATGCCAGGACGC   |         |

**Table S2. Primers used in Chip-PCR and Chip-qPCR**

| Name        | Sequence (5' to 3')    |
|-------------|------------------------|
| Cyclin A2-F | GGGACAGCATTATGAGACCCTG |
| Cyclin A2-R | CCCCGTCTGGGTACTACTAC   |
| Cyclin B1-F | GTGAGCACTGCACGCCATGC   |
| Cyclin B1-R | GAATGCGTTTCCTGGGCGATC  |
| Cyclin D1-F | TCTTCCTTGGCTTGCCTGTG   |
| Cyclin D1-R | GAGACCTGTGGAGGTGGGG    |
